# Supplementary material
Source: PubMed Central journal article supplement (PMC4426260)

Supplemental Figure 1

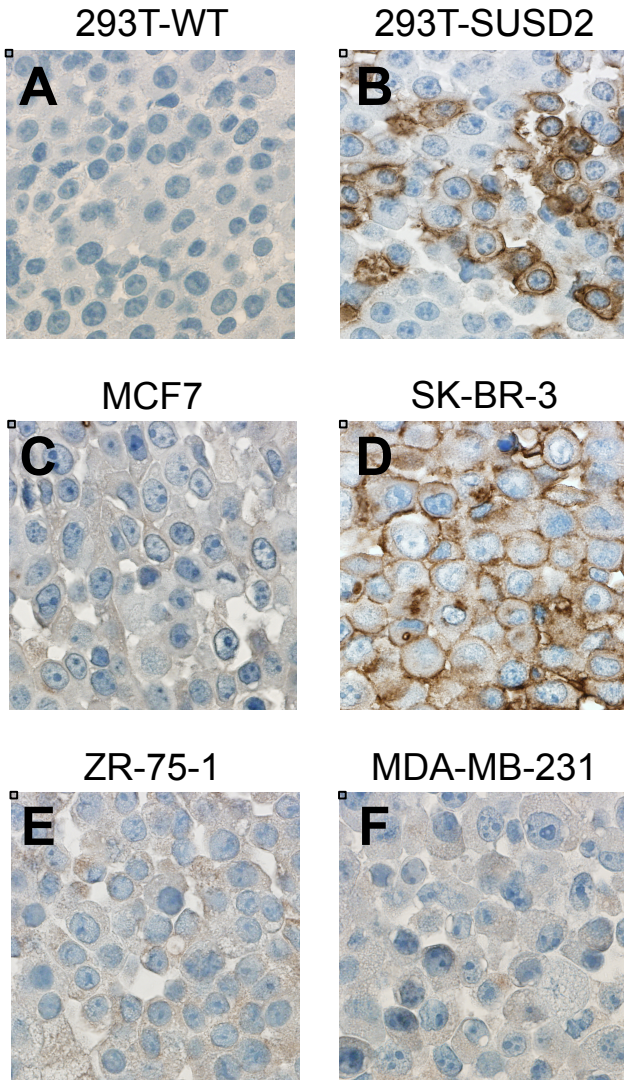

Supplement: NIHMS418629-supplement-2.pdf [file NIHMS418629-supplement-2.pdf]
